# Supplementary material for: Sleep in patients with disorders of consciousness characterized by means of machine learning
Source: PubMed Central journal article supplement (PMC5749793; doi:10.1371/journal.pone.0190458), 2018-01-02
Supplement: pone.0190458.s001.pdf [file pone.0190458.s001.pdf]

| Nb | Age (years) | Sex | Aetiology | Period since injury (months) | Clinical condition | Clinical assessment | CRS-R total score | Follow-up diagnosis | Period between recording and follow-up (months) |
|----|-------------|-----|-----------|------------------------------|--------------------|---------------------|-------------------|---------------------|-------------------------------------------------|
| 1  | 74          | F   | TBI       | 1                            | sub-acute          | UWS                 | 3                 | death               | 24                                              |
| 2  | 19          | M   | SSPE      | 24                           | chronic            | UWS                 | 3                 | -                   | -                                               |
| 3  | 52          | M   | TBI       | 13                           | chronic            | UWS                 | 4                 | MCS                 | 14                                              |
| 4  | 58          | F   | CVA       | 28                           | chronic            | UWS                 | 4                 | death               | -                                               |
| 5  | 50          | F   | CVA       | 45                           | chronic            | UWS                 | 4                 | -                   | -                                               |
| 6  | 62          | M   | CVA       | 1                            | chronic            | UWS                 | 4                 | death               | 1                                               |
| 7  | 61          | M   | anoxia    | 32                           | chronic            | UWS                 | 4                 | death               | -                                               |
| 8  | 54          | M   | anoxia    | 9                            | chronic            | UWS                 | 5                 | death               | 10                                              |
| 9  | 21          | M   | TBI       | 7                            | sub-acute          | UWS                 | 6                 | UWS                 | 150                                             |
| 10 | 16          | M   | TBI       | 21                           | chronic            | UWS                 | 6                 | -                   | -                                               |
| 11 | 61          | F   | CVA       | 1                            | sub-acute          | UWS                 | 6                 | SD-                 | 12                                              |
| 12 | 16          | F   | TBI       | 1                            | sub-acute          | UWS                 | 7                 | SD-                 | 12                                              |
| 13 | 45          | M   | TBI       | 12                           | sub-acute          | MCS                 | 8                 | eMCS                | 24                                              |
| 14 | 62          | M   | TBI       | 2                            | sub-acute          | MCS                 | 8                 | -                   | -                                               |
| 15 | 34          | M   | anoxia    | 240                          | chronic            | MCS                 | 8                 | -                   | -                                               |
| 16 | 66          | M   | CVA       | 3                            | sub-acute          | MCS                 | 10                | -                   | -                                               |
| 17 | 61          | M   | anoxia    | 2                            | sub-acute          | MCS                 | 10                | -                   | -                                               |
| 18 | 48          | M   | TBI       | 8                            | sub-acute          | MCS                 | 11                | death               | -                                               |
| 19 | 31          | F   | CVA       | 1.5                          | sub-acute          | MCS                 | 11                | -                   | -                                               |
| 20 | 21          | M   | anoxia    | 28                           | chronic            | MCS                 | 13                | MCS                 | 20                                              |
| 21 | 30          | M   | TBI       | 120                          | chronic            | MCS                 | 13                | MCS                 | 67                                              |
| 22 | 50          | F   | TBI       | 113                          | chronic            | MCS                 | 14                | -                   | -                                               |
| 23 | 43          | F   | TBI       | 6                            | sub-acute          | MCS                 | 21                | -                   | -                                               |
